# Supplementary material
Source: PubMed Central journal article supplement (PMC4700663)
Supplement: DS_10.1177_0022034515609062.pdf [file DS_10.1177_0022034515609062.pdf]

# Microbial Nucleic Acid Sensing in Oral and Systemic Diseases

Journal of Dental Research  
DS1–DS2  
© International & American Associations  
for Dental Research 2015  
Reprints and permissions:  
sagepub.com/journalsPermissions.nav  
DOI: 10.1177/0022034515609062  
jdr.sagepub.com

K.E. Crump<sup>1</sup> and S.E. Sahingur<sup>1,2,3</sup>

## Appendix

**Appendix Table.** Studies that Investigated TLR9 in the Course of Periodontal Inflammation.

| Type of Study                                                                                                                                             | Tissue/Source                                                                            | References                                                                                                                                      |
|-----------------------------------------------------------------------------------------------------------------------------------------------------------|------------------------------------------------------------------------------------------|-------------------------------------------------------------------------------------------------------------------------------------------------|
| <b>Computational</b>                                                                                                                                      |                                                                                          |                                                                                                                                                 |
| TLR9 was identified as a promising candidate gene for studying periodontitis pathogenesis                                                                 | Genome-wide association studies and expression profiles in periodontitis lesions         | Zhan et al. (2014)                                                                                                                              |
| <b>Clinical</b>                                                                                                                                           |                                                                                          |                                                                                                                                                 |
| Increased TLR9 gene and protein expression in patients with chronic periodontitis                                                                         | Gingival biopsies                                                                        | Kajita et al. (2007); Beklen et al. (2008); Rojo-Botello et al. (2012); Sahingur et al. (2013); Wara-aswapati et al. (2013); Chen et al. (2014) |
| Increased TLR9 in patients with chronic periodontitis positively correlated with <i>Porphyromonas gingivalis</i> numbers in subgingival plaque            | Gingival biopsies and plaque samples                                                     | Wara-aswapati et al. (2013)                                                                                                                     |
| TLR9 specific polymorphisms were associated with chronic periodontitis                                                                                    | Genomic DNA                                                                              | Holla et al. (2010); Sahingur et al. (2011)                                                                                                     |
| <b>In vivo</b>                                                                                                                                            |                                                                                          |                                                                                                                                                 |
| TLR9 <sup>-/-</sup> mice were protected from <i>P. gingivalis</i> -induced periodontal bone loss                                                          | TLR9 <sup>-/-</sup> and wild-type mice                                                   | Kim et al. (2015)                                                                                                                               |
| <b>In vitro</b>                                                                                                                                           |                                                                                          |                                                                                                                                                 |
| Periodontal bacteria and bDNA triggered cytokine production in human and murine cells through TLR9                                                        | Monocytes/macrophages, gingival fibroblasts and epithelial cells, and murine splenocytes | Takeshita et al. (1999); Nonnenmacher et al. (2003); Sahingur et al. (2010); Kim et al. (2012); Sahingur et al. (2012); Kim et al. (2015)       |
| <i>Fusobacterium nucleatum</i> and <i>P. gingivalis</i> enhanced HIV-1 reactivation through TLR2 and TLR9                                                 | Monocytes/macrophages                                                                    | Gonzalez et al. (2010)                                                                                                                          |
| TLR9 deficiency affected inflammatory responses to TLR2 and TLR4 agonists in murine cells                                                                 | Macrophages and splenocytes from TLR9 <sup>-/-</sup> and wild-type mice                  | Kim et al. (2015)                                                                                                                               |
| Synergistic induction of antimicrobial factors in human oral epithelial cells when activated with a combination of synthetic TLR9, NOD1, or NOD2 agonists | Human oral epithelial cells                                                              | Uehara and Takada (2008)                                                                                                                        |
| Human cytomegalovirus and Epstein-Barr virus down-regulated TLR9 expression and diminished TNF production in periodontal bacteria-infected macrophages    | Macrophages                                                                              | Lin and Li (2009)                                                                                                                               |

<sup>1</sup>Department of Periodontics, School of Dentistry, Virginia Commonwealth University, Richmond, VA, USA

<sup>2</sup>Philips Institute for Oral Health Research, Virginia Commonwealth University, Richmond, VA, USA

<sup>3</sup>Department of Microbiology and Immunology, School of Medicine, Virginia Commonwealth University, Richmond, VA, USA

**Corresponding Author:**

S.E. Sahingur, Department of Periodontics, School of Dentistry, Virginia Commonwealth University, 521 North 11th Street, P.O. Box 980566, Richmond, VA 23298, USA.  
Email: ssahingur@vcu.edu

## Appendix References

- Beklen A, Hukkanen M, Richardson R, Kontinen YT. 2008. Immunohistochemical localization of toll-like receptors 1-10 in periodontitis. *Oral Microbiol Immunol.* 23(5):425-431.
- Chen YC, Liu CM, Jeng JH, Ku CC. 2014. Association of pocket epithelial cell proliferation in periodontitis with TLR9 expression and inflammatory response. *J Formos Med Assoc.* 113(8):549-556.
- Gonzalez OA, Li MT, Ebersole JL, Huang CB. 2010. HIV-1 reactivation induced by the periodontal pathogens *Fusobacterium nucleatum* and *Porphyromonas gingivalis* involves toll-like receptor 4 and 9 activation in monocytes/macrophages. *Clin Vaccine Immunol.* 17(9):1417-1427.
- Holla LI, Vokurka J, Hrdlickova B, Augustin P, Fassmann A. 2010. Association of toll-like receptor 9 haplotypes with chronic periodontitis in Czech population. *J Clin Periodontol.* 37(2):152-159.
- Kajita K, Honda T, Amanuma R, Domon H, Okui T, Ito H, Yoshie H, Tabeta K, Nakajima T, Yamazaki K. 2007. Quantitative messenger RNA expression of toll-like receptors and interferon-alpha1 in gingivitis and periodontitis. *Oral Microbiol Immunol.* 22(6):398-402.
- Kim PD, Xia-Juan X, Crump KE, Abe T, Hajishengallis G, Sahingur SE. 2015. Toll-like receptor 9-mediated inflammation triggers alveolar bone loss in experimental murine periodontitis. *Infect Immun.* 83(7):2992-3002.
- Kim Y, Jo AR, Jang da H, Cho YJ, Chun J, Min BM, Choi Y. 2012. Toll-like receptor 9 mediates oral bacteria-induced IL-8 expression in gingival epithelial cells. *Immunol Cell Biol.* 90(6):655-663.
- Lin YL, Li M. 2009. Human cytomegalovirus and Epstein-Barr virus inhibit oral bacteria-induced macrophage activation and phagocytosis. *Oral Microbiol Immunol.* 24(3):243-248.
- Nonnenmacher C, Dalpke A, Zimmermann S, Flores-De-Jacoby L, Mutters R, Heeg K. 2003. DNA from periodontopathogenic bacteria is immunostimulatory for mouse and human immune cells. *Infect Immun.* 71(2):850-856.
- Rojo-Botello NR, Garcia-Hernandez AL, Moreno-Fierros L. 2012. Expression of toll-like receptors 2, 4 and 9 is increased in gingival tissue from patients with type 2 diabetes and chronic periodontitis. *J Periodontol Res.* 47(1):62-73.
- Sahingur SE, Xia XJ, Alamgir S, Honma K, Sharma A, Schenkein HA. 2010. DNA from *Porphyromonas gingivalis* and *Tannerella forsythia* induce cytokine production in human monocytic cell lines. *Mol Oral Microbiol.* 25(2):123-135.
- Sahingur SE, Xia XJ, Gunsolley J, Schenkein HA, Genco RJ, De Nardin E. 2011. Single nucleotide polymorphisms of pattern recognition receptors and chronic periodontitis. *J Periodontol Res.* 46(2):184-192.
- Sahingur SE, Xia XJ, Schifferle RE. 2012. Oral bacterial DNA differ in their ability to induce inflammatory responses in human monocytic cell lines. *J Periodontol.* 83(8):1069-1077.
- Sahingur SE, Xia XJ, Voth SC, Yeudall WA, Gunsolley JC. 2013. Increased nucleic acid receptor expression in chronic periodontitis. *J Periodontol.* 84(10):e48-e57.
- Takeshita A, Imai K, Hanazawa S. 1999. CpG motifs in *Porphyromonas gingivalis* DNA stimulate interleukin-6 expression in human gingival fibroblasts. *Infect Immun.* 67(9):4340-4345.
- Uehara A, Takada H. 2008. Synergism between TLRs and NOD1/2 in oral epithelial cells. *J Dent Res.* 87(7):682-686.
- Wara-aswapati N, Chayasadam A, Surarit R, Pitiphat W, Boch JA, Nagasawa T, Ishikawa I, Izumi Y. 2013. Induction of toll-like receptor expression by *Porphyromonas gingivalis*. *J Periodontol.* 84(7):1010-1018.
- Zhan YB, Zhang RM, Lv HC, Song XJ, Xu XM, Chai L, Lv WH, Shang ZW, Jiang YS, Zhang RJ. 2014. Prioritization of candidate genes for periodontitis using multiple computational tools. *J Periodontol.* 85(8):1059-1069.
